# Supplementary material
Source: HighWire-hosted journal article supplement (https://jnm.snmjournals.org/highwire/filestream/94830/field_highwire_adjunct_files/0/162628_Supplemental_Data.pdf)
Supplement: 162628_Supplemental_Data.pdf [file 162628_Supplemental_Data.pdf]

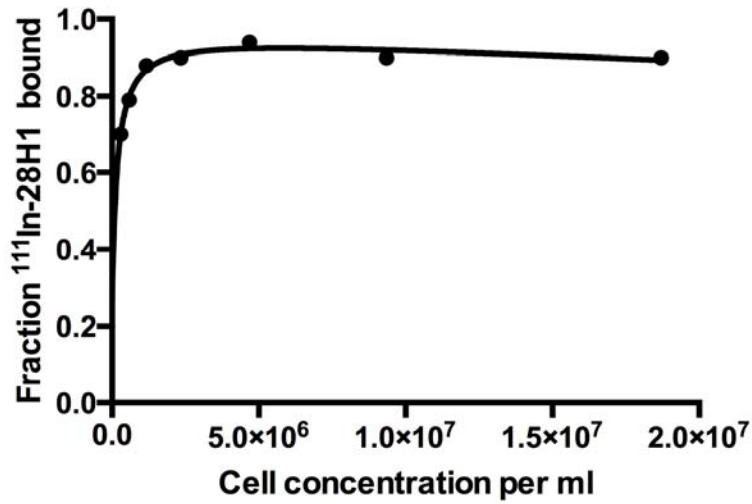

**Supplemental Figure 1.**

Binding plot of <sup>111</sup>In-28H1 to HEK-293 human embryonic kidney cells overexpressing FAP. In brief, cells (serially diluted; 800  $\mu$ l total) were incubated with <sup>111</sup>In-28H1 (100,000 CPM/tube) for 60 minutes at 37  $^{\circ}$ C. Cells were then pelleted by centrifugation and the amount of activity bound to the cells was calculated.

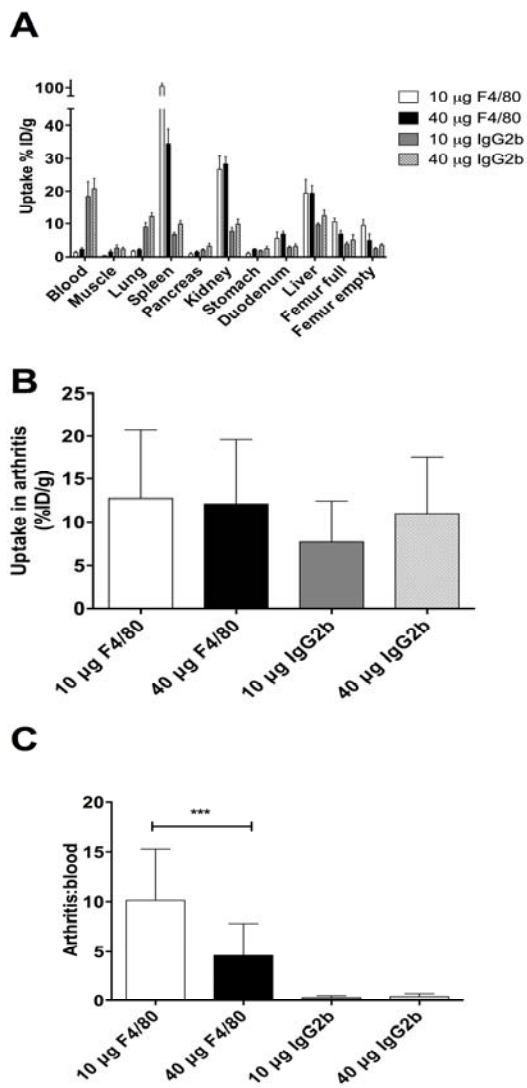

**Supplemental Figure 2.**

Dosing study  $^{111}\text{In}$ -anti-F4/80,  $^{111}\text{In}$ -ratIgG2b. General biodistribution of tracers at 10 or 40  $\mu\text{g}$  dose in arthritic mice at 24 h (A). Uptake in arthritic joints (B) or expressed as arthritis:blood ratios (C). Data are average  $\pm$  standard deviation ( $n=4-5$  mice/group). \*\*\*( $p \leq 0.001$ ).

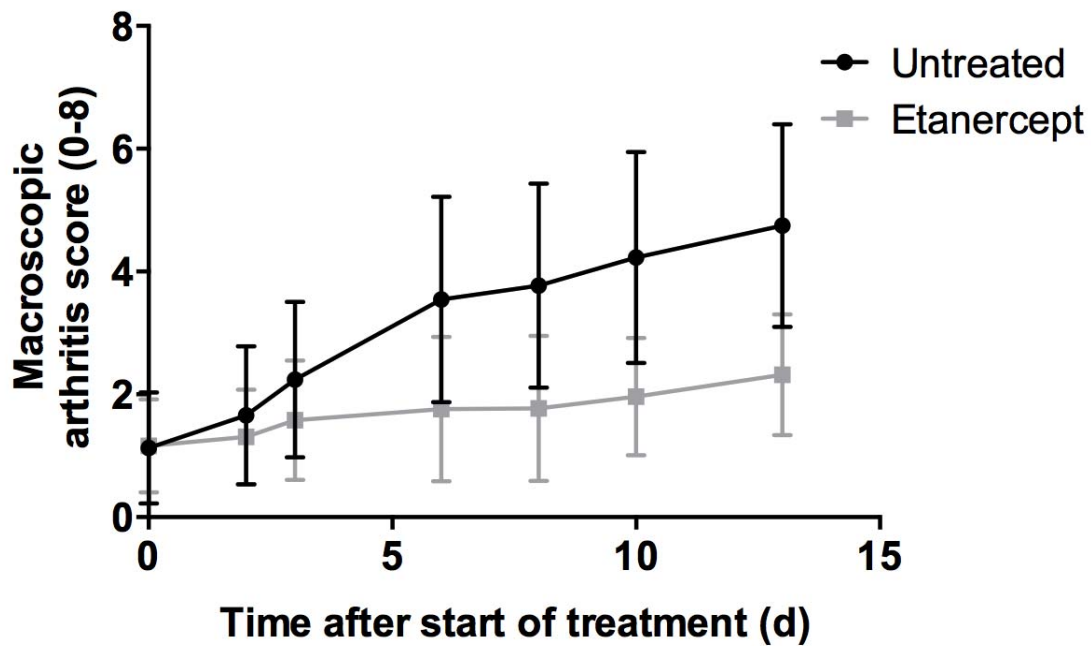

**Supplemental Figure 3.**

Effect of etanercept on murine collagen-induced arthritis score with time. Data are average  $\pm$  standard deviation. Due to staggering the induction of RA in mice, the number of mice/time point/group was 22 for the first two measurements, 33 for the 3<sup>rd</sup>, and 44 for the 4<sup>th</sup> measurement onwards. Mice were injected with tracers at the last time point. Imaging and biodistribution experiments with tracers were carried out at 13-15 days after start of treatment. 2-way ANOVA showed the difference between untreated/Etanercept is significant (interaction  $p < 0.0001$ ).

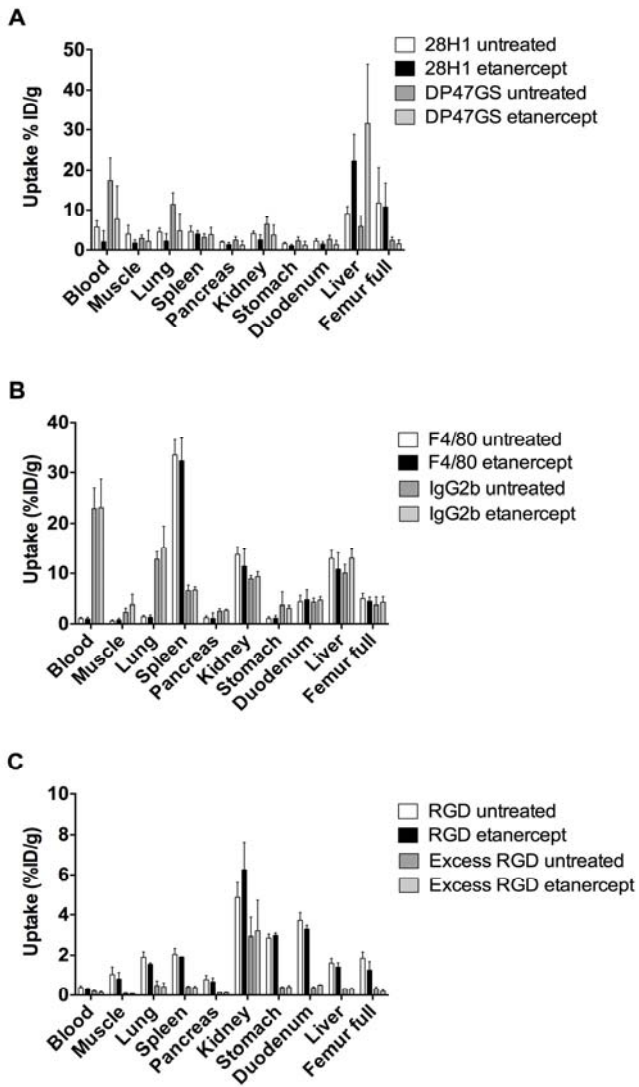

**Supplemental Figure 4.**

Joint uptake of tracers in untreated or etanercept-treated CIA mice at 48 h ( $^{111}\text{In}$ -28H1,  $^{111}\text{In}$ -DP47GS; A), 24 h ( $^{111}\text{In}$ -anti-F4/80,  $^{111}\text{In}$ -ratIgG2b; B) and 1 h p.i. ( $^{111}\text{In}$ -RGD<sub>2</sub> with/without excess unlabeled; C). Data are average  $\pm$  standard deviation (n=7-10 mice/group (A, B) or 2 mice/group (C)).

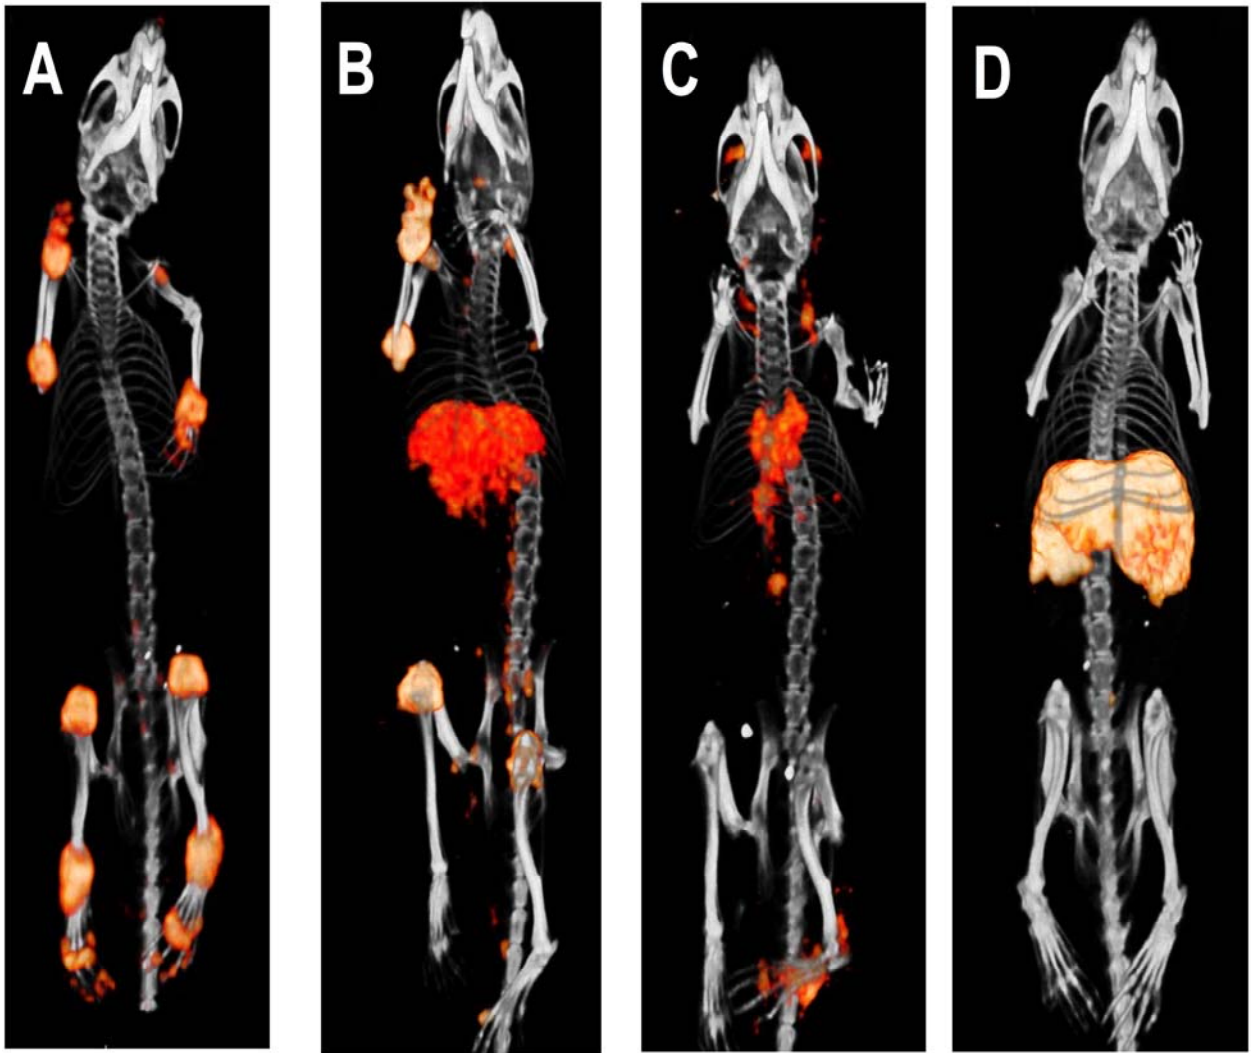

**Supplemental Figure 5**

3D SPECT/CT scans of untreated (A, C) and etanercept-treated (B, D) CIA mice 48 h p.i. of  $^{111}\text{In}$ -28H1 (A-B) and  $^{111}\text{In}$ -DP47GS (C-D). All images are scaled equally.

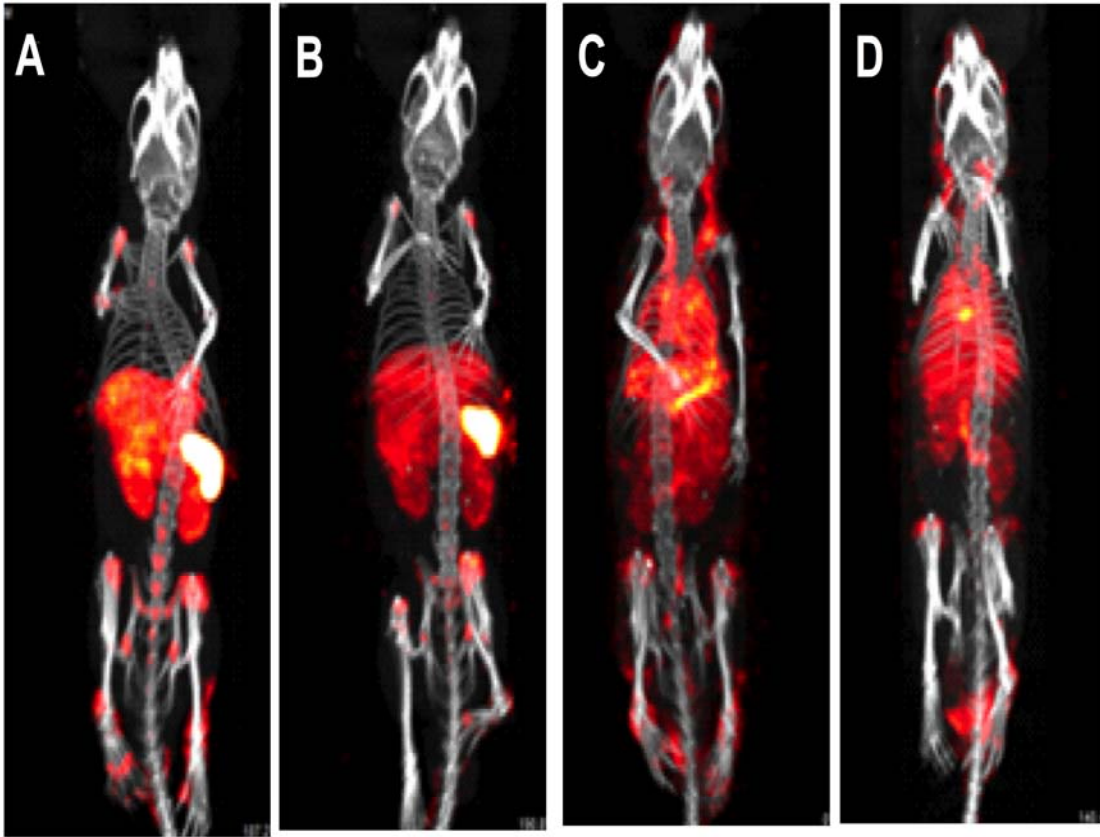

**Supplemental Figure 6**

3D SPECT/CT scans of untreated (A, C) and etanercept-treated (B, D) CIA mice 24 h p.i. of  $^{111}\text{In}$ -anti-F4/80 (A-B) and  $^{111}\text{In}$ -ratIgG2b (C-D). All images are scaled equally.

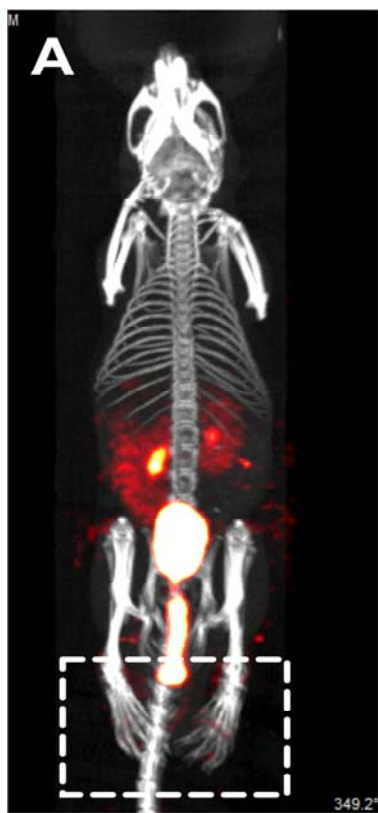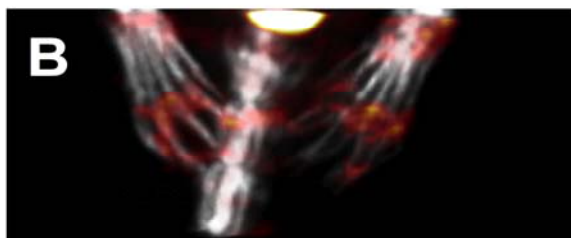

**Supplemental Figure 7**

3D SPECT/CT scans of untreated CIA mice 1 h p.i. of  $^{111}\text{In}$ -RGD<sub>2</sub> (A-B). Panel B is a cropped version of Panel A, with higher windowing.

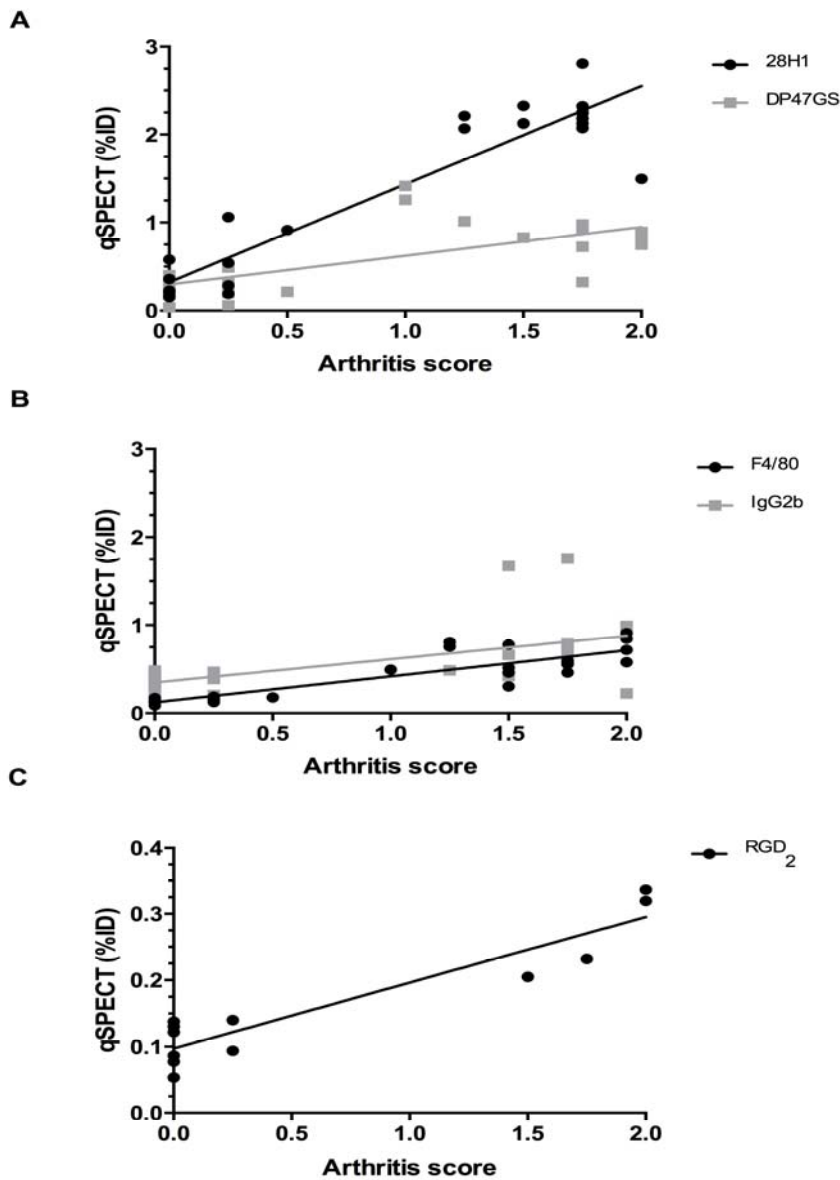

### Supplemental Figure 8

Joint uptake as measured by quantitative SPECT of tracers in untreated or etanercept-treated CIA mice at 48 h ( $^{111}\text{In}$ -28H1,  $^{111}\text{In}$ -DP47GS; A), 24 h ( $^{111}\text{In}$ -anti-F4/80,  $^{111}\text{In}$ -ratIgG2b; B) and 1 h p.i. ( $^{111}\text{In}$ -RGD<sub>2</sub>; C). Data are of individual joints (n=3-6 mice/group, 4 joints/mouse). Slopes are as follows: A: 28H1:  $1.11 \pm 0.09$  and DP47GS:  $0.33 \pm 0.07$ ; B: F4/80:  $0.30 \pm 0.04$  and IgG2b:  $0.26 \pm 0.08$ ; C:  $0.10 \pm 0.01$ .
